# Supplementary material for: Domino ring-opening–ring-closing enyne metathesis vs enyne metathesis of norbornene derivatives with alkynyl side chains. Construction of condensed polycarbocycles
Source: publisher site journal article supplement (doi:10.3762/bjoc.14.248), 2018-10-25
Supplement: Additional file 1 [file 1860-5397-14-248-S1.pdf]

**Supporting Information**

**for**

**Domino ring-opening–ring-closing enyne metathesis vs enyne metathesis of norbornene derivatives with alkynyl side chains. Construction of condensed polycarbocycles**

Ritabrata Datta and Subrata Ghosh\*

Address: School of Chemical Sciences, Indian Association for the Cultivation of Science, Jadavpur, Kolkata 700 032, India

Email: Subrata Ghosh\* - ocs@iacs.res.in

\*Corresponding author

**Experimental and analytical data**

## Experimental section

General experimental methods are similar to [49].

**Synthesis of diol 6.** A solution of the known lactol **5** (1.1 g, 5.72 mmol) in anhydrous Et<sub>2</sub>O (20 mL) was slowly added to a solution of propargyl magnesium bromide [prepared by adding propargyl bromide (1.97 mL, 22.89 mmol) to a mixture of magnesium turnings (550 mg, 22.88 mmol) and HgCl<sub>2</sub> (78 mg, 0.286 mmol) in Et<sub>2</sub>O (20 mL)] at 0 °C for 30 min. The reaction was quenched by adding saturated aqueous solution of NH<sub>4</sub>Cl (5 mL) and was filtered through celite. The celite was washed by Et<sub>2</sub>O (3 × 30 mL). The combined filtrate was washed with brine (5 mL) and dried. The residue after evaporation of organic layer was purified by column chromatography (30% EA/PE) to provide the diol **6** (1.17 g, 88%) as an oil. <sup>1</sup>H NMR (300 MHz) δ 6.13-6.06 (2H, m), 4.02 (2H, brs), 3.58 (1H, q, *J* = 4.5 Hz), 3.51-3.43 (2H, m), 2.45-2.33 (4H, m), 2.11-2.01 (3H, m), 1.81-1.64 (3H, m), 1.49-1.35 (2H, m), 1.28-1.17 (1H, m); <sup>13</sup>C NMR (75 MHz) δ 137.0, 135.0, 81.9, 73.4, 70.9, 67.4, 61.8, 61.1, 52.0, 51.7, 45.6, 36.5, 33.0, 28.7, 24.8; HRMS (ESI) *m/z* Calcd for C<sub>15</sub>H<sub>20</sub>O<sub>2</sub>Na [M + Na]<sup>+</sup> 255.1361, found 255.1363.

**Synthesis of silyl ether 7a.** In a similar manner to a procedure from [49] the diol **6** (1 g, 4.30 mmol) was silylated to afford the silyl ether **7a** (oil, 1.37 g, 92%) as an oil; <sup>1</sup>H NMR (300 MHz) δ 6.17 (1H, dd, *J* = 2.7, 5.7 Hz), 6.08 (1H, dd, *J* = 3, 5.7 Hz), 4.36 (1H, s), 3.58-3.49 (3H, m), 2.44-2.31 (4H, m), 2.21-2.14 (1H, m), 1.99 (1H, t, *J* = 2.7 Hz), 1.93-1.87 (1H, m), 1.85-1.64 (3H, m), 1.47-1.35 (2H, m), 1.26-1.16 (1H, m), 0.87 (9H, s), 0.07 (6H, s); <sup>13</sup>C NMR (75 MHz) δ 136.2 (X 2), 83.0, 73.1, 69.3, 68.5, 62.9, 61.1, 52.0, 51.9, 45.8, 36.7, 33.2, 28.7, 25.9 (X3), 24.3, 18.3, -5.5, -5.6; HRMS (ESI) *m/z* Calcd for C<sub>21</sub>H<sub>34</sub>O<sub>2</sub>SiNa [M + Na]<sup>+</sup> 369.2226, found 369.2223.

**Synthesis of norbornene derivative 7b.** To a solution of the silyl ether **7a** (1.35 g, 3.90 mmol) in anhydrous DCM (15 mL) was added Et<sub>3</sub>N (4.31 mL, 31.16 mmol), catalytic amount of 4-dimethylaminopyridine (DMAP) (10 mg) and acetic anhydride (1.47 mL, 15.58 mmol). The mixture was stirred for 72 h. On dilution with water (10 mL) the reaction mixture was extracted with Et<sub>2</sub>O (3 × 50 mL). The combined extract was washed with brine and dried. The residue left after evaporation of solvent under vacuo was purified by column chromatography (10% EA/PE) to afford the acetate derivative **7b** as a colorless oil (1.17 g, 77%); IR: 2954, 1743, 1471, 1245 cm<sup>-1</sup>; <sup>1</sup>H NMR (300 MHz) δ 6.26 (1H, dd, *J* = 3, 6 Hz), 6.17 (1H, dd, *J* = 3, 6 Hz), 4.73-4.70 (1H, m), 3.16-3.08 (2H, m), 2.74 (1H, s), 2.56-2.51 (1H, m), 2.50-2.43 (2H, m), 2.28-2.21 (1H, m), 2.01 (3H, m), 1.98-1.95 (1H, m), 1.83-1.67 (3H, m), 1.47-1.25 (4H, m), 0.88 (9H, s), -0.01 (3H, s), -0.02 (3H, s); <sup>13</sup>C NMR (75 MHz) δ 170.0, 138.9, 135.1, 80.6, 74.4, 70.7, 67.0, 61.6, 61.1, 51.2, 49.4, 44.6, 36.6, 34.6, 27.8, 26.0 (X 3), 23.4, 21.3, 18.4, -5.4, -5.5; HRMS (ESI) *m/z* Calcd for C<sub>23</sub>H<sub>36</sub>O<sub>3</sub>SiNa [M + Na]<sup>+</sup> 411.2332, found 411.2330.

**Synthesis of dinitrobenzoate derivative 13.** A solution of the diene **11** (200 mg, 0.53 mmol) in DCM (10 mL) was treated with Et<sub>3</sub>N (0.6 mL, 4.27 mmol), catalytic amount of DMAP (10 mg) and 3,5-dinitrobenzoyl chloride (493 mg, 2.14 mmol) was stirred at rt for 72 h. A saturated aqueous solution of NaHCO<sub>3</sub> (5 mL) was added to the reaction mixture. The reaction mixture was extracted with Et<sub>2</sub>O (3 × 20 mL). The combined organic extract was washed with brine (5 mL) and dried. Evaporation of solvent under vacuo provided a viscous mass (178 mg). Without any purification and characterization this product was directly used for the next step. To a solution of this mass in THF (10 mL) was treated with 6 N HCl (20 mL) at rt for 3 h. The reaction mixture was extracted with diethyl ether (3 × 20 mL). The combined ether layer was washed with saturated NaHCO<sub>3</sub> (5 mL), brine (5 mL) and dried.

Evaporation of solvent under vacuo followed by column chromatography (20% EA/PE) of the residual mass provided the hydroxy-compound **13** (122mg, 51%) as a white solid which was crystallized (20% PE/DCM) to afford the pure compound **13**, m.p. 171-172 °C; IR: 2954, 1735, 1627, 1548  $\text{cm}^{-1}$ ;  $^1\text{H}$  NMR (300 MHz)  $\delta$  9.19 (1H, t,  $J = 2.1$  Hz), 9.03-9.02 (2H, m), 6.39 (1H, dd,  $J = 3, 6$  Hz), 6.35-6.34 (1H, m), 6.30-6.24 (1H, m), 5.34-5.28 (1H, m), 5.20-5.09 (2H, m), 4.94 (2H, d,  $J = 6$  Hz), 3.38 (1H, d,  $J = 10.2$  Hz), 3.15 (1H, d,  $J = 10.2$  Hz), 2.80-2.75 (1H, m), 2.73-2.46 (4H, m), 2.06-1.28 (7H, m), 0.97-0.85 (1H, m);  $^{13}\text{C}$  NMR (75 MHz)  $\delta$  161.5, 148.8, 142.4 (X 2), 138.6, 138.5, 135.2, 134.8, 129.3 (X 2), 122.2, 119.9, 114.0, 78.5, 66.9, 62.8, 61.0, 51.9, 50.2, 45.3, 36.3, 35.9, 34.6, 28.3; HRMS (ESI)  $m/z$  Calcd for  $\text{C}_{24}\text{H}_{27}\text{N}_2\text{O}_7$   $[\text{M} + \text{H}]^+$  455.1818, found 455.1816.

**Synthesis of diol 15.** In a similar manner to a procedure from [49] the lactol **5** (1.0 g, 5.20 mmol) in THF (20 mL) was added to a solution of lithium (trimethylsilyl) acetylide. The crude product obtained as above was dissolved in dry MeOH (15 mL) and then  $\text{K}_2\text{CO}_3$  (1.44 g, 10.40 mmol) was added to it. The mixture was stirred for 2 h and was filtered through celite. The celite bed was washed with  $\text{Et}_2\text{O}$  (20 mL). Then the filtrate was evaporated under vacuo and the residue was purified by column chromatography (30% EA/PE) to afford the diol **15** (1.02 g, 90%) as a liquid;  $^1\text{H}$  NMR (300 MHz)  $\delta$  6.18 (1H, s), 6.12 (1H, s), 4.86 (1H, brs), 4.22 (1H, brs), 4.16 (1H, s), 3.46 (2H, dd,  $J = 11.4, 35.7$  Hz), 2.67 (1H, s), 2.42 (1H, s), 2.36 (1H, s), 2.31-2.25 (1H, m), 2.07-2.01 (1H, m), 1.83-1.76 (2H, m), 1.74-1.61 (1H, m), 1.54-1.37 (3H, m);  $^{13}\text{C}$  NMR (75 MHz)  $\delta$  136.6, 136.2, 84.3, 72.9, 67.7, 67.4, 63.0, 60.0, 52.9, 52.3, 45.5, 36.7, 34.6, 28.6; HRMS  $\text{C}_{14}\text{H}_{19}\text{O}_2$   $[\text{M} + \text{H}]^+$  219.1385, found 219.1386.

**Synthesis of silyl ether 16.** In a similar manner to a procedure from [49] the diol **15** (995 mg, 4.56 mmol) was converted to the silyl ether **16** as colorless oil (1.44 g, 95%);  $^1\text{H}$  NMR (300

MHz)  $\delta$  6.19 (1H, s), 6.07-6.06 (1H, m), 4.70 (1H, s), 4.15 (1H, s), 3.55 (1H, d,  $J$  = 10.5, Hz), 3.41 (1H, d,  $J$  = 10.5 Hz), 2.66 (1H, s), 2.37-2.32 (3H, m), 1.91-1.63 (4H, m), 1.50-1.32 (3H, m), 0.84 (9H, s), 0.04 (3H, s), 0.03 (3H, s).  $^{13}\text{C}$  NMR (75 MHz)  $\delta$  136.6, 135.9, 84.3, 71.9, 68.7, 67.3, 63.3, 60.0, 52.9, 52.2, 45.6, 36.9, 34.6, 28.6, 25.8 (X 3), 18.1, -5.6, -5.7; HRMS:  $\text{C}_{20}\text{H}_{32}\text{O}_2\text{SiNa}$   $[\text{M} + \text{Na}]^+$  355.2069, found 355.2068.

**Synthesis of acetate 17.** Following the procedure described for synthesis of the acetyl derivative **7b**, the carbinol **16** (800 mg, 2.41 mmol) was converted to the norbornene derivative **17** as colorless oil (739 mg, 83%) using acetic anhydride (0.91 mL, 9.62 mmol) and  $\text{Et}_3\text{N}$  (2.66 mL, 19.24 mmol) after purification by column chromatography (10% EA/PE). The acetate displayed the following spectral data: IR: 2955, 1747, 1469, 1228  $\text{cm}^{-1}$ ;  $^1\text{H}$  NMR (300 MHz)  $\delta$  6.22-6.21 (2H, m), 4.85 (1H, d,  $J$  = 1.8 Hz), 3.18 (1H, d,  $J$  = 8.7 Hz), 2.98 (1H, dd,  $J$  = 9, 1.5 Hz), 2.72 (2H, dd,  $J$  = 11.1, 1.2 Hz), 2.39 (1H, d,  $J$  = 2.1 Hz), 2.29-2.27 (1H, m), 2.01 (3H, s), 1.98-1.92 (1H, m), 1.82-1.68 (3H, m), 1.56-1.23 (3H, m), 0.86 (9H, s), -0.04 (6H, s);  $^{13}\text{C}$  NMR (75 MHz)  $\delta$  169.5, 138.4, 135.6, 81.2, 73.2, 69.0, 66.2, 61.5, 60.1, 51.9, 49.8, 44.4, 36.5, 36.0, 27.5, 25.9 (X 3), 21.0, 18.3, -5.4, -5.6; HRMS:  $\text{C}_{22}\text{H}_{35}\text{O}_3\text{Si}$   $[\text{M} + \text{H}]^+$  375.2355, found 375.2351.

**Synthesis of the diyne 18.** In a similar manner to a procedure from [49] the norbornene derivative **17** (600 mg, 1.60 mmol) was subjected to cleavage to afford the corresponding bis-aldehyde. A solution of methyl triphenyl phosphonium bromide (2.29 g, 6.41 mmol) in THF (20 mL) was treated with KHMDS [0.5 (M) in toluene] (16.0 mL, 8.01 mmol) at 0 °C for 30 min. To it a solution of the bis-aldehyde obtained above in THF (10 mL) was added at 0 °C for 1 h. The reaction was quenched by saturated aqueous  $\text{NH}_4\text{Cl}$  (5 mL). The resulting mixture was extracted with  $\text{Et}_2\text{O}$  (3  $\times$  30 mL). The combined ether layer was washed with brine (5 mL) and dried. Solvent was evaporated under reduced pressure and purified by

column chromatography (8% EA/PE) to afford the dienyne **18** (420 mg, 66%) as an oil; IR: 2954, 1743, 1471, 1238  $\text{cm}^{-1}$ ;  $^1\text{H}$  NMR (400 MHz)  $\delta$  6.24-6.11 (1H, m), 5.90-5.87 (1H, m), 5.76 (1H, s), 5.01-4.93 (4H, m), 4.03 (1H, d,  $J = 10.4$  Hz), 3.52 (1H, d,  $J = 10.4$  Hz), 2.47 (1H, d,  $J = 2.4$  Hz), 2.34-2.26 (2H, m), 2.02 (3H, s), 1.77-1.61 (7H, m), 1.54-1.51 (1H, m), 0.90 (9H, s), 0.06 (3H, s), 0.03 (3H, s);  $^{13}\text{C}$  NMR (100 MHz)  $\delta$  169.5, 139.3, 139.1, 115.0, 114.7, 82.1, 75.2, 67.2, 64.2, 60.6, 60.5, 54.1, 53.2, 38.9, 37.6, 36.4, 26.0 (X 3), 21.8, 21.1, 18.4, -5.5, -5.6; HRMS (ESI)  $m/z$  Calcd for  $\text{C}_{24}\text{H}_{38}\text{O}_3\text{SiNa}$   $[\text{M} + \text{Na}]^+$  425.2488, found 425.2487.

### Crystal data for compound **13**

|                                              |                                                  |
|----------------------------------------------|--------------------------------------------------|
| Compound reference                           | <b>13</b>                                        |
| Chemical formula                             | $\text{C}_{24}\text{H}_{26}\text{N}_2\text{O}_7$ |
| Formula Mass                                 | 454.47                                           |
| Crystal system                               | Triclinic                                        |
| $a/\text{\AA}$                               | 8.25(2)                                          |
| $b/\text{\AA}$                               | 10.46(2)                                         |
| $c/\text{\AA}$                               | 13.93(3)                                         |
| $\alpha/^\circ$                              | 77.91(4)                                         |
| $\beta/^\circ$                               | 76.47(4)                                         |
| $\gamma/^\circ$                              | 85.92(4)                                         |
| Unit cell volume/ $\text{\AA}^3$             | 1142(5)                                          |
| Temperature/K                                | 293(2)                                           |
| Space group                                  | $P1, \bar{1}$                                    |
| No. of formula units per unit cell, $Z$      | 2                                                |
| Radiation type                               | MoK $\alpha$                                     |
| Absorption coefficient, $\mu/\text{mm}^{-1}$ | 0.098                                            |
| No. of reflections measured                  | 3415                                             |
| No. of independent reflections               | 2381                                             |
| $R_{int}$                                    | 0.0399                                           |
| Final $R_I$ values ( $I > 2\sigma(I)$ )      | 0.1576                                           |
| Final $wR(F^2)$ values ( $I > 2\sigma(I)$ )  | 0.4564                                           |
| Final $R_I$ values (all data)                | 0.1863                                           |
| Final $wR(F^2)$ values (all data)            | 0.4746                                           |
| Goodness of fit on $F^2$                     | 1.845                                            |
| CCDC number                                  | 1847091                                          |

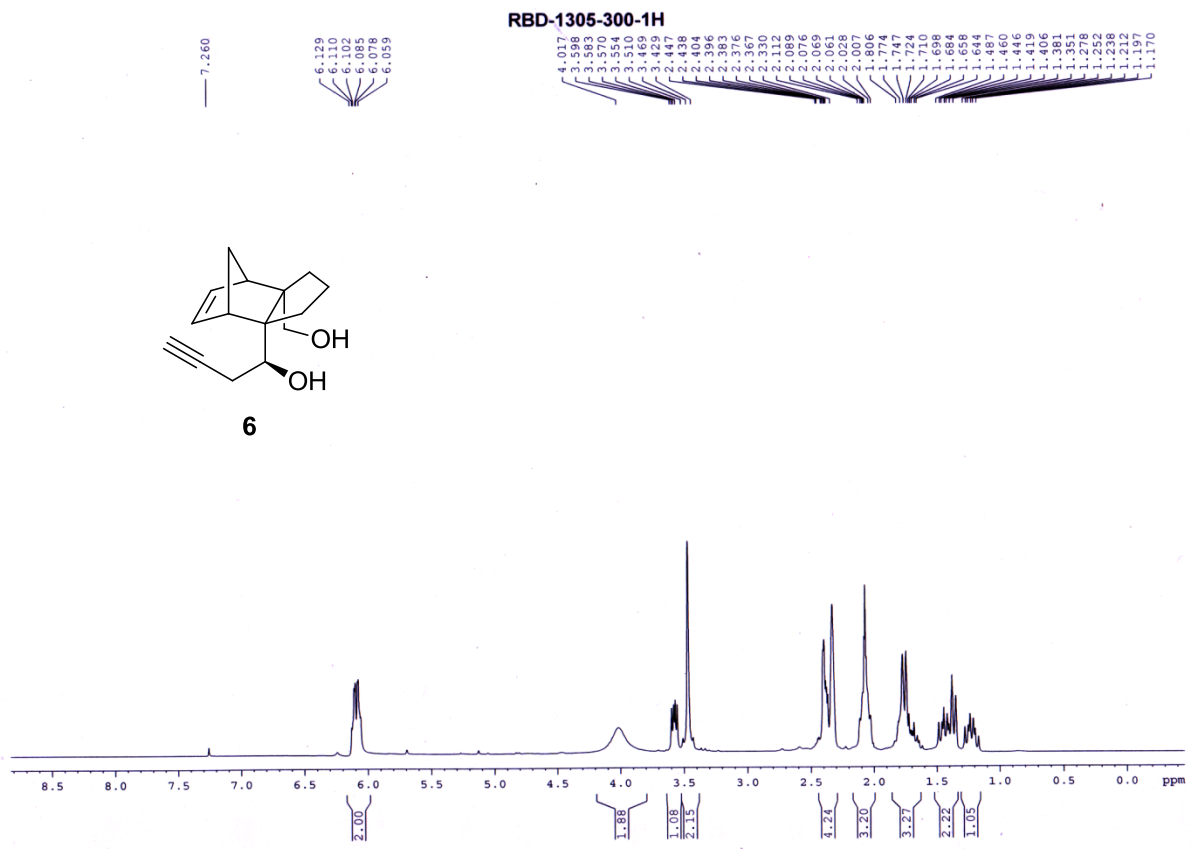



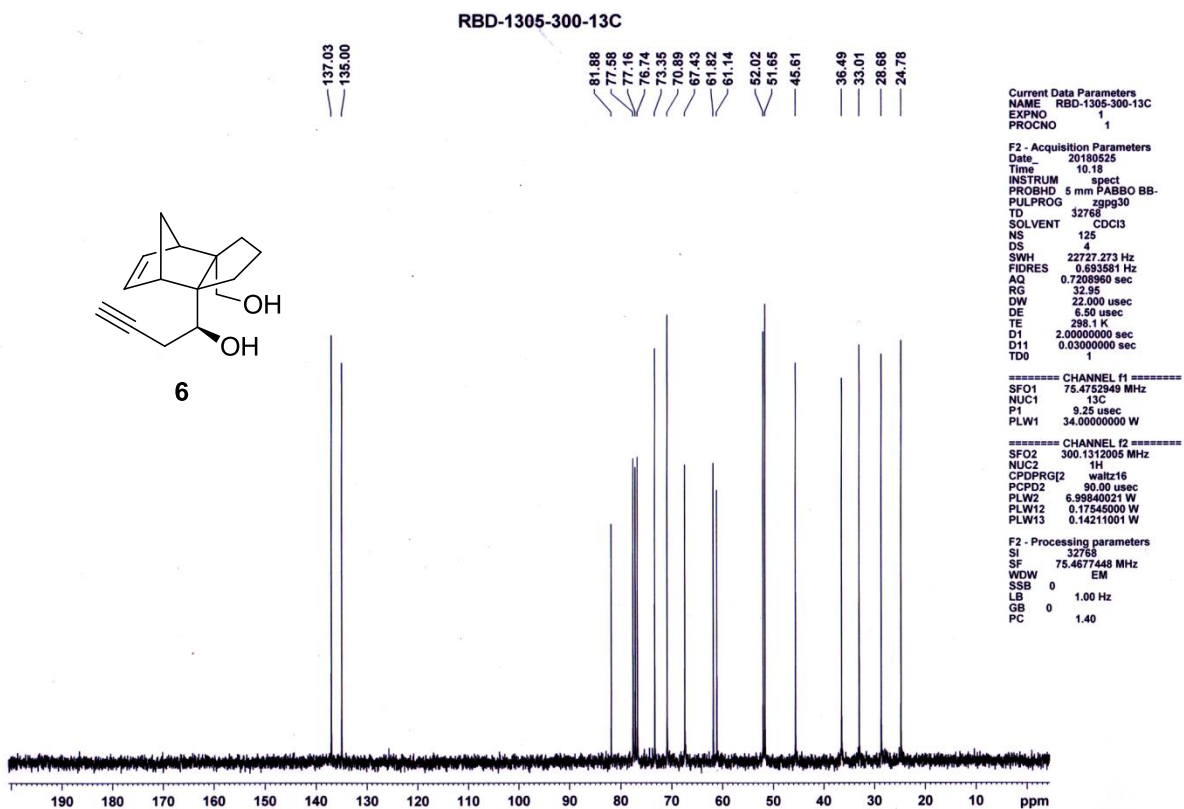

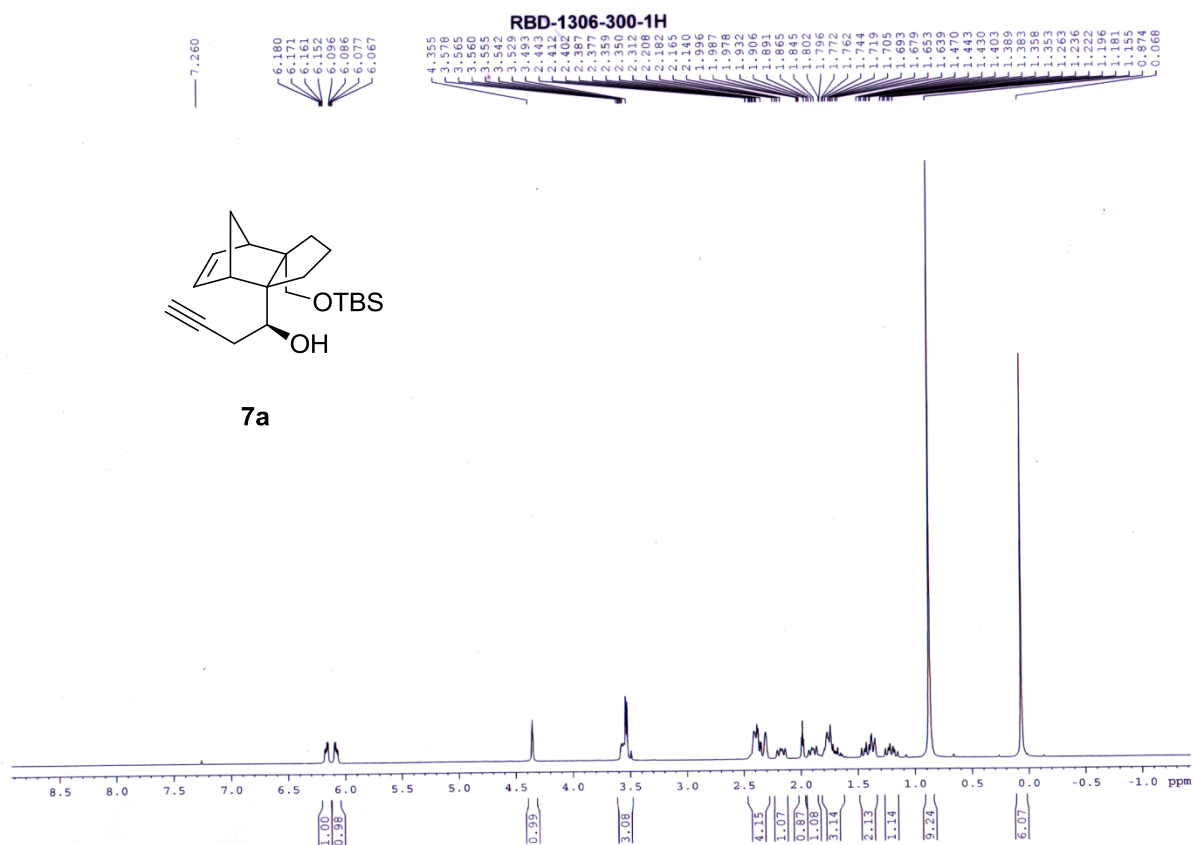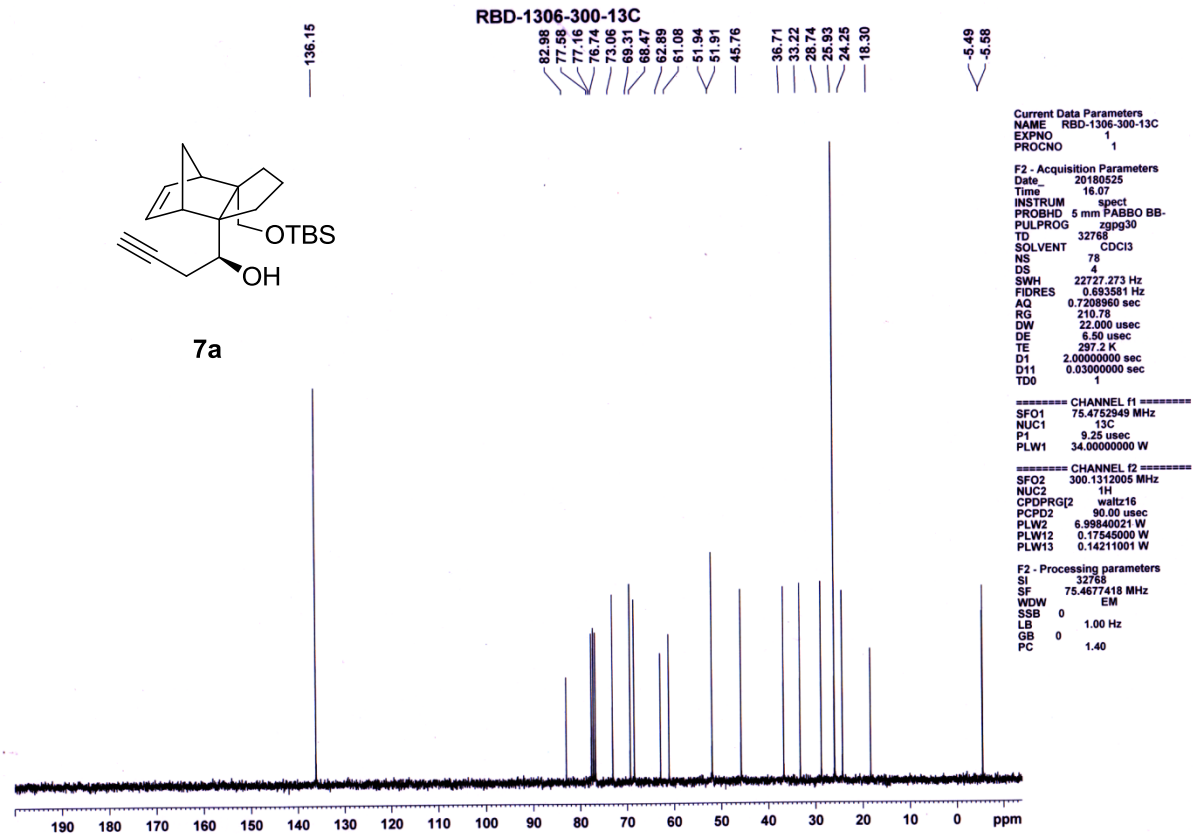

Current Data Parameters  
NAME RBD-1306-300-13C  
EXPNO 1  
PROCNO 1

F2 - Acquisition Parameters  
Date\_ 20160525  
Time 16.07  
INSTRUM spect  
PROBHD 5 mm PABBO BB-  
PULPROG zgpg30  
TD 32768  
SOLVENT CDCl3  
NS 76  
DS 4  
SWH 22727.273 Hz  
FIDRES 0.693581 Hz  
AQ 0.7208960 sec  
RG 210.78  
DW 22.000 usec  
DE 6.50 usec  
TE 297.2 K  
D1 2.00000000 sec  
D11 0.03000000 sec  
TD0 1

===== CHANNEL f1 =====  
SFO1 75.4752949 MHz  
NUC1 13C  
P1 9.25 usec  
PLW1 34.00000000 W

===== CHANNEL f2 =====  
SFO2 300.1312006 MHz  
NUC2 1H  
CPDPRG2 waltz16  
PCPD2 80.00 usec  
PLW2 6.99840021 W  
PLW12 0.17545000 W  
PLW13 0.14211001 W

F2 - Processing parameters  
SI 32768  
SF 75.4677418 MHz  
WDW EM  
SSB 0  
LB 1.00 Hz  
GB 0  
PC 1.40

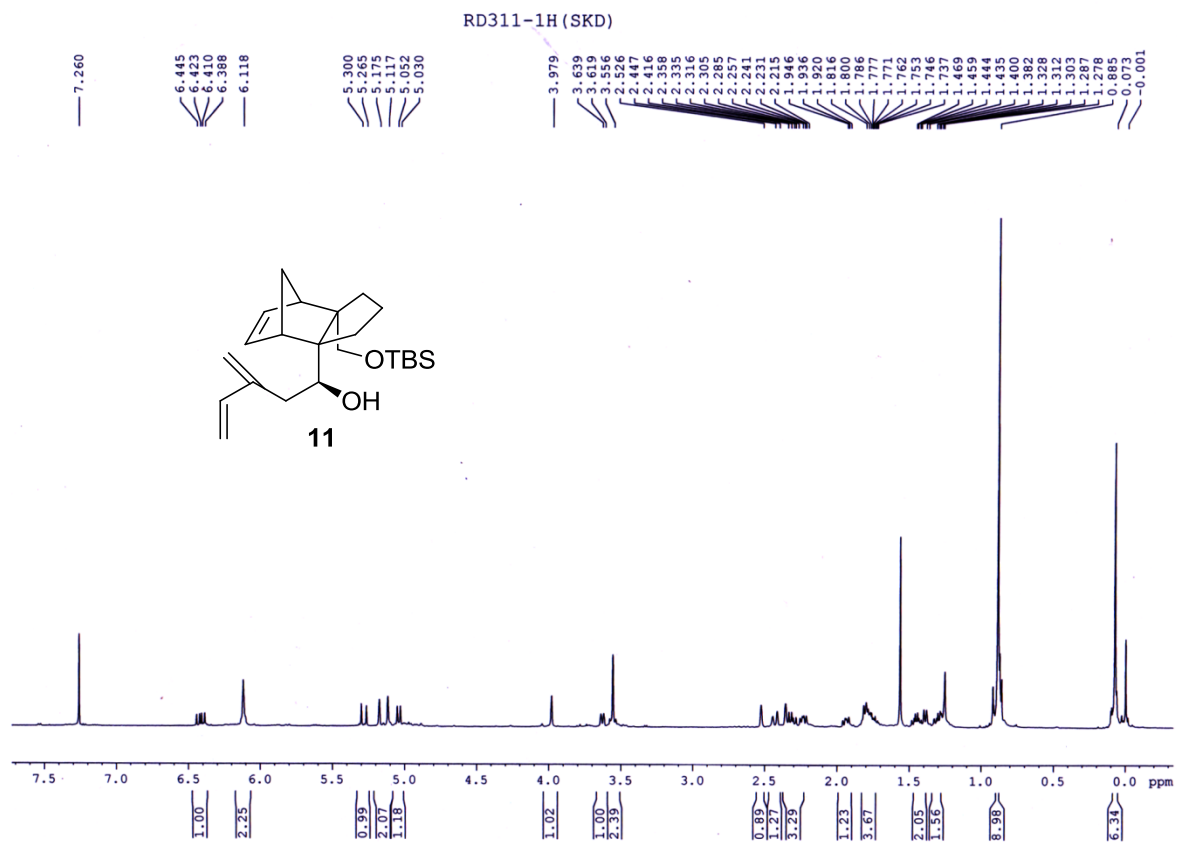

RB167.US-13C (SKD)

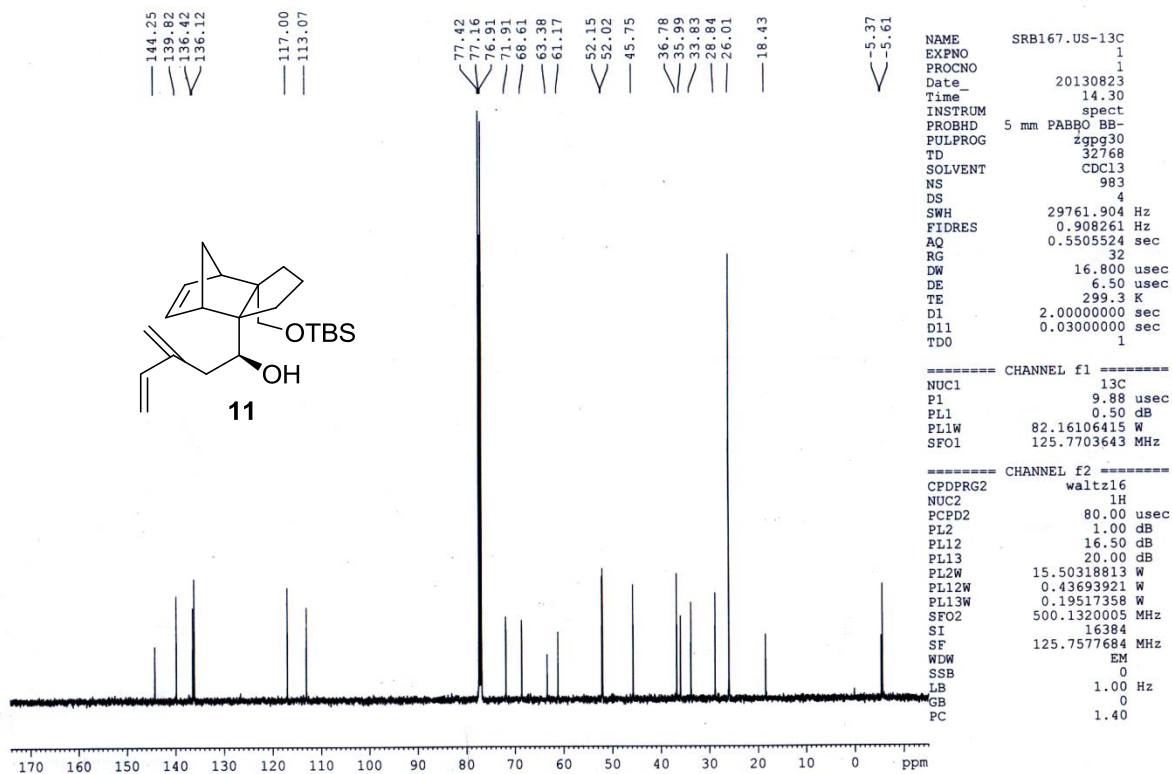

RD-312.1-300-1H

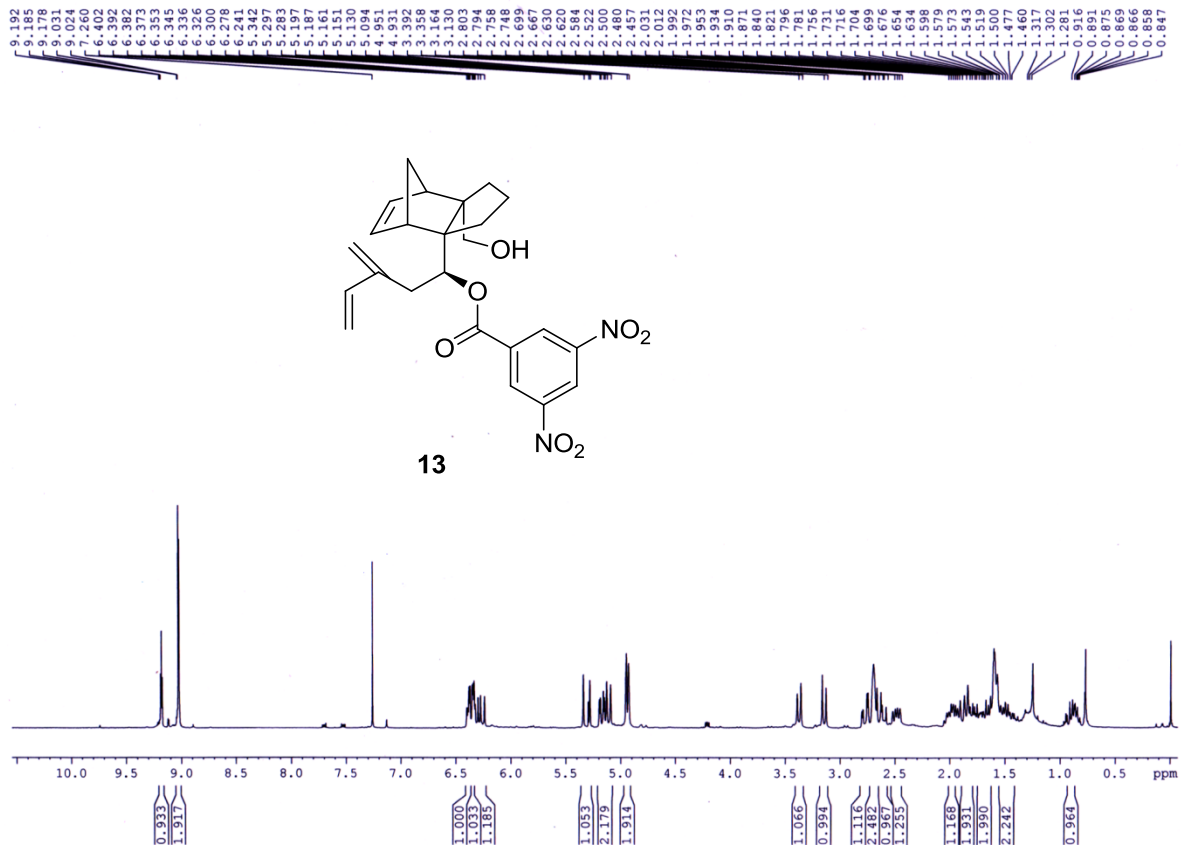

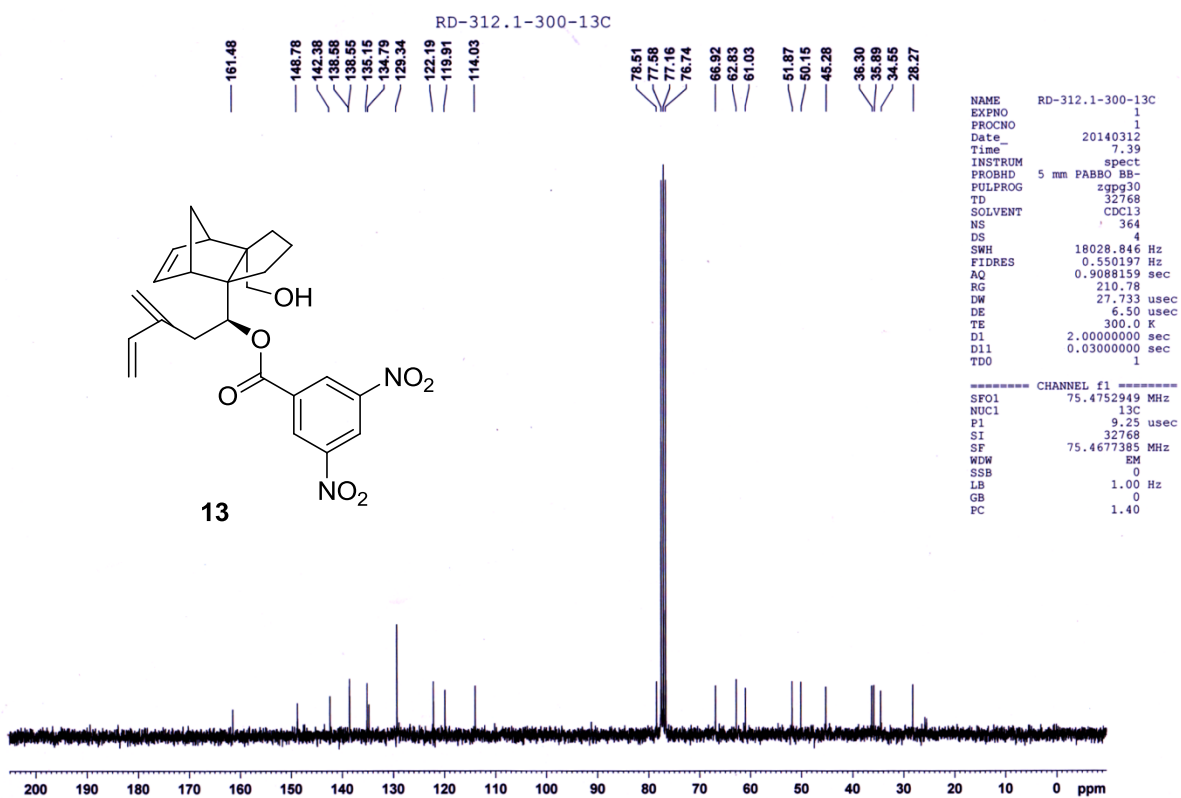









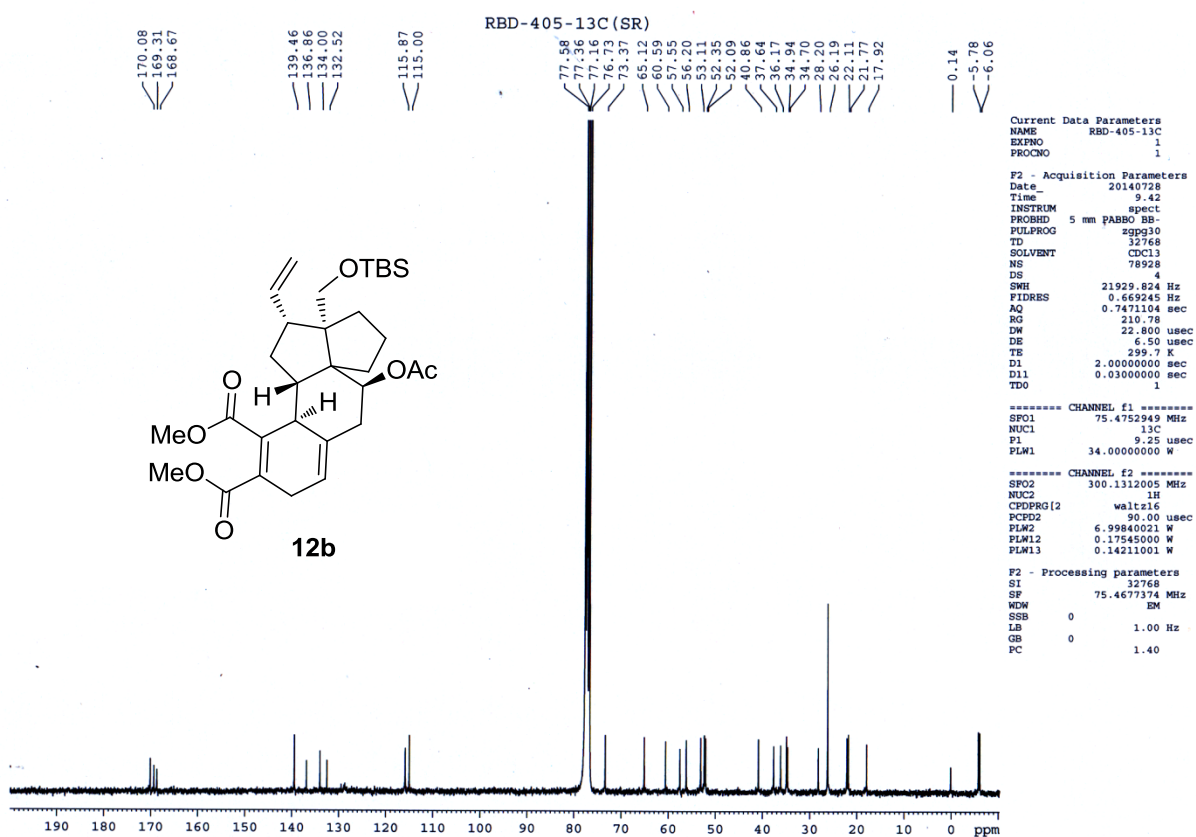

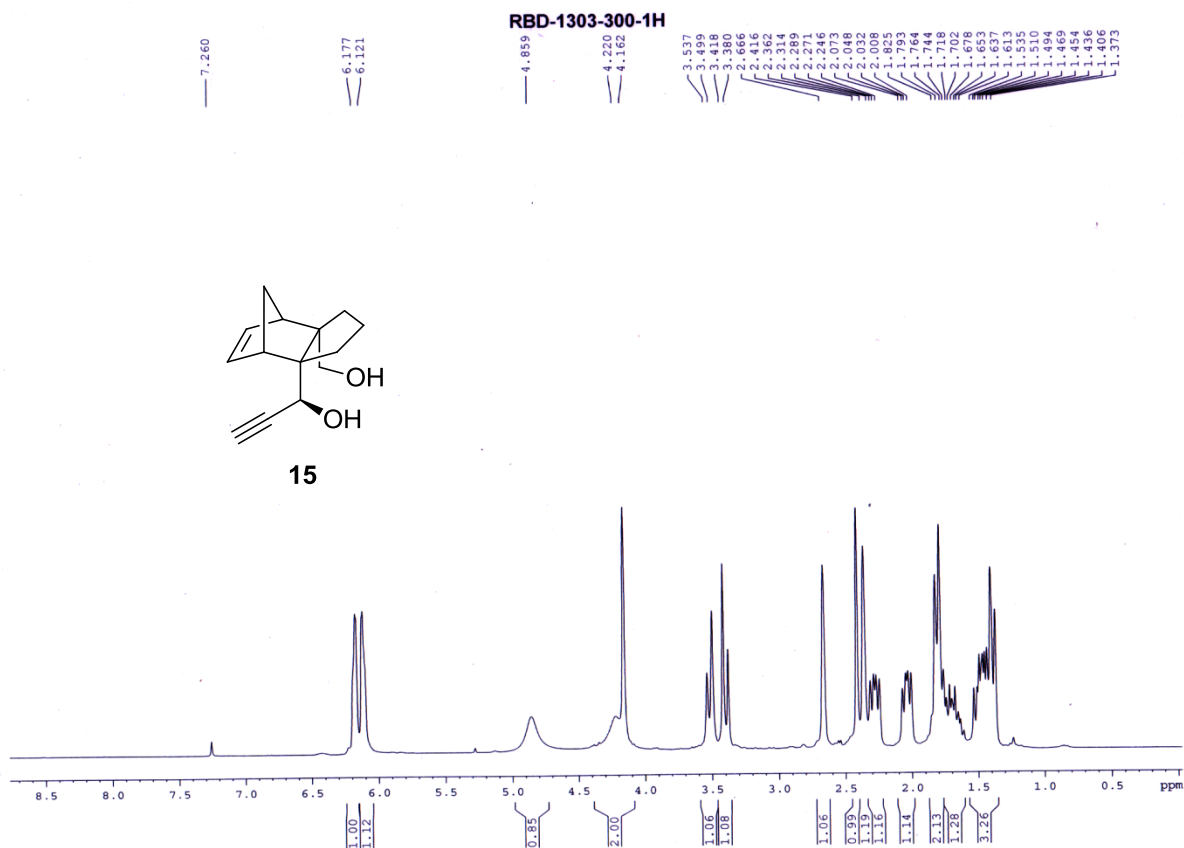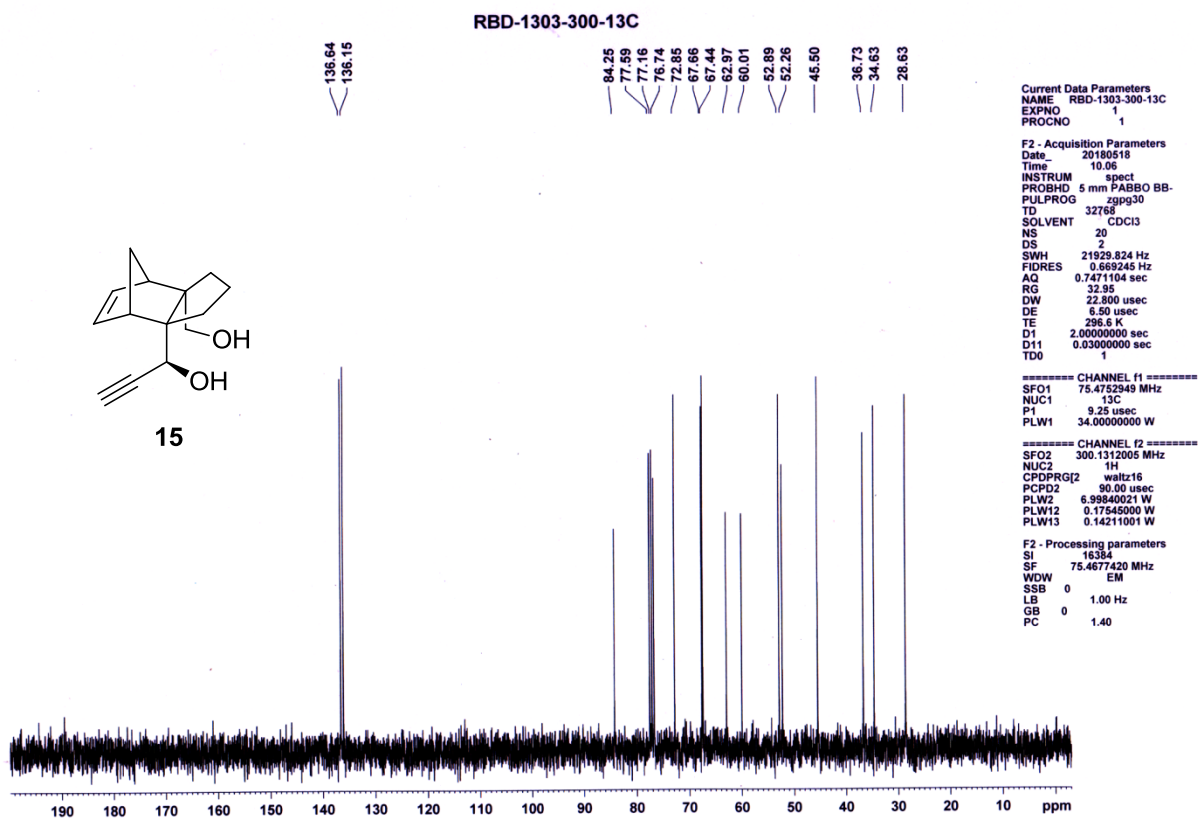

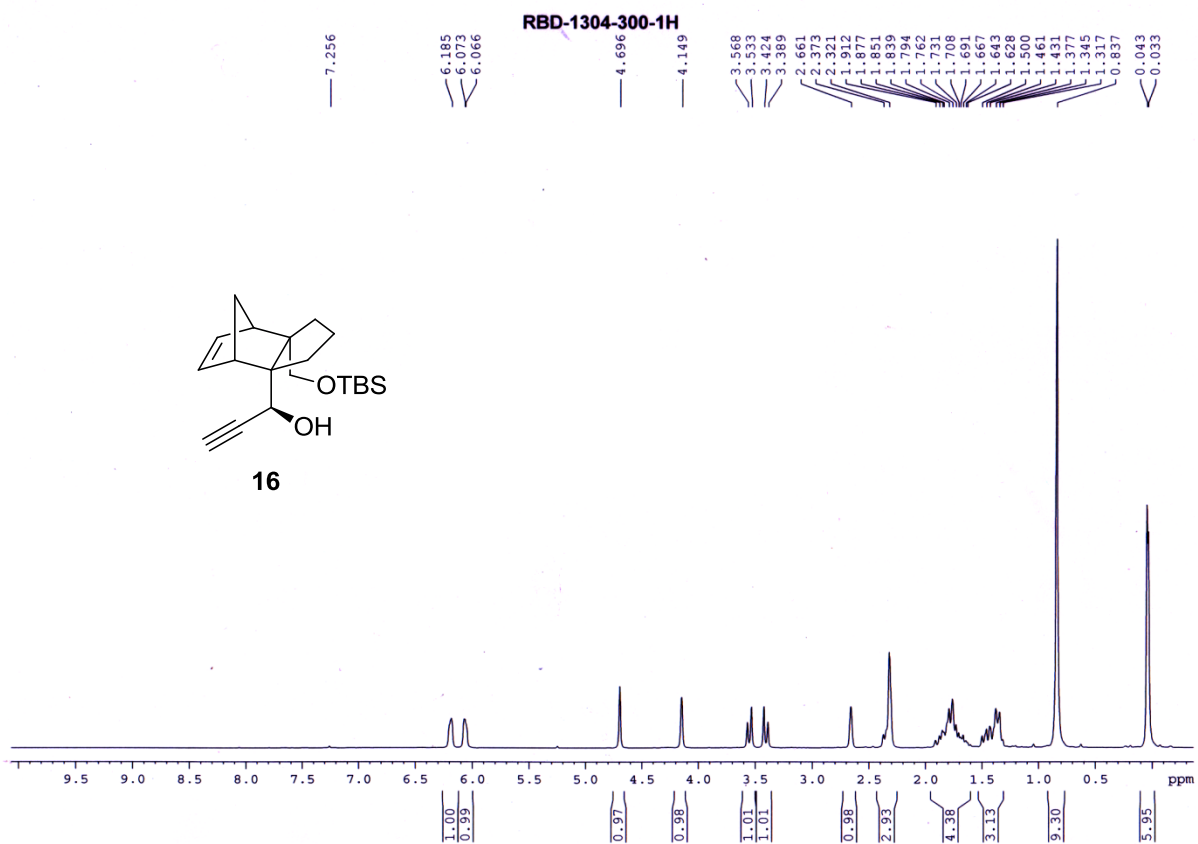

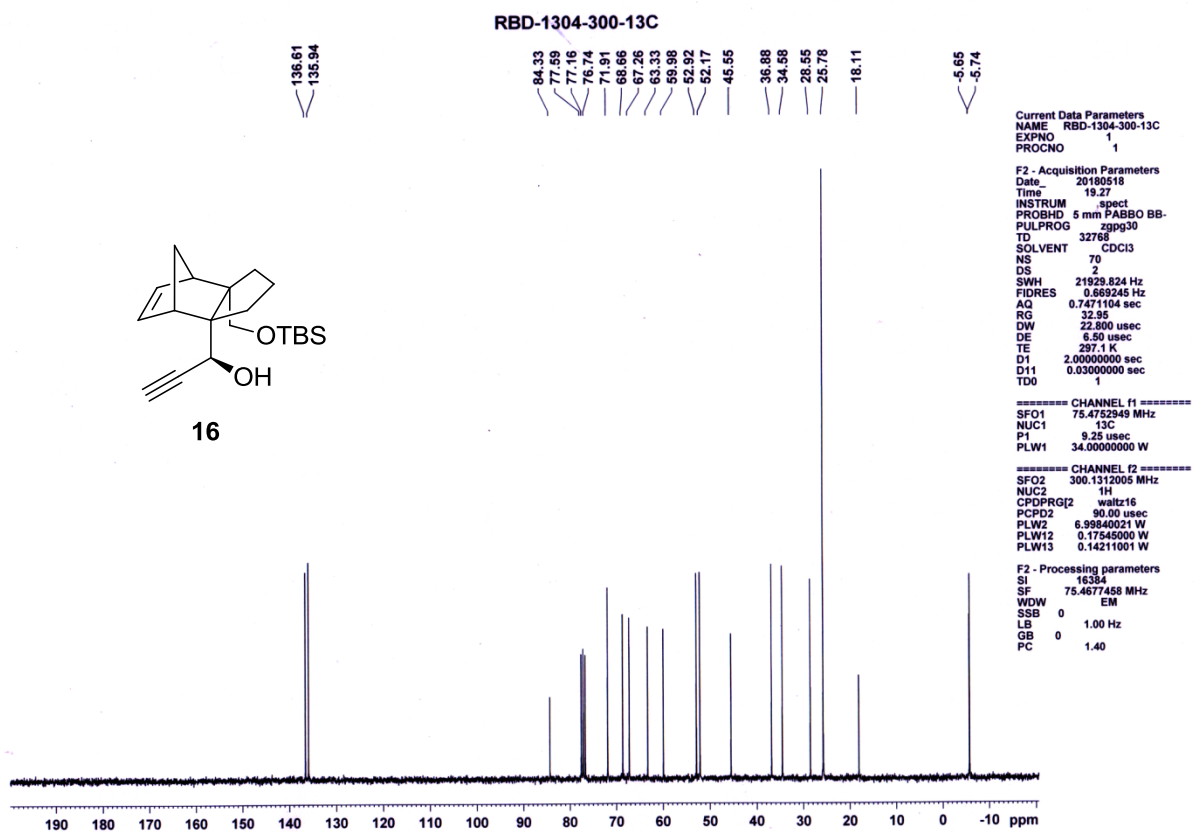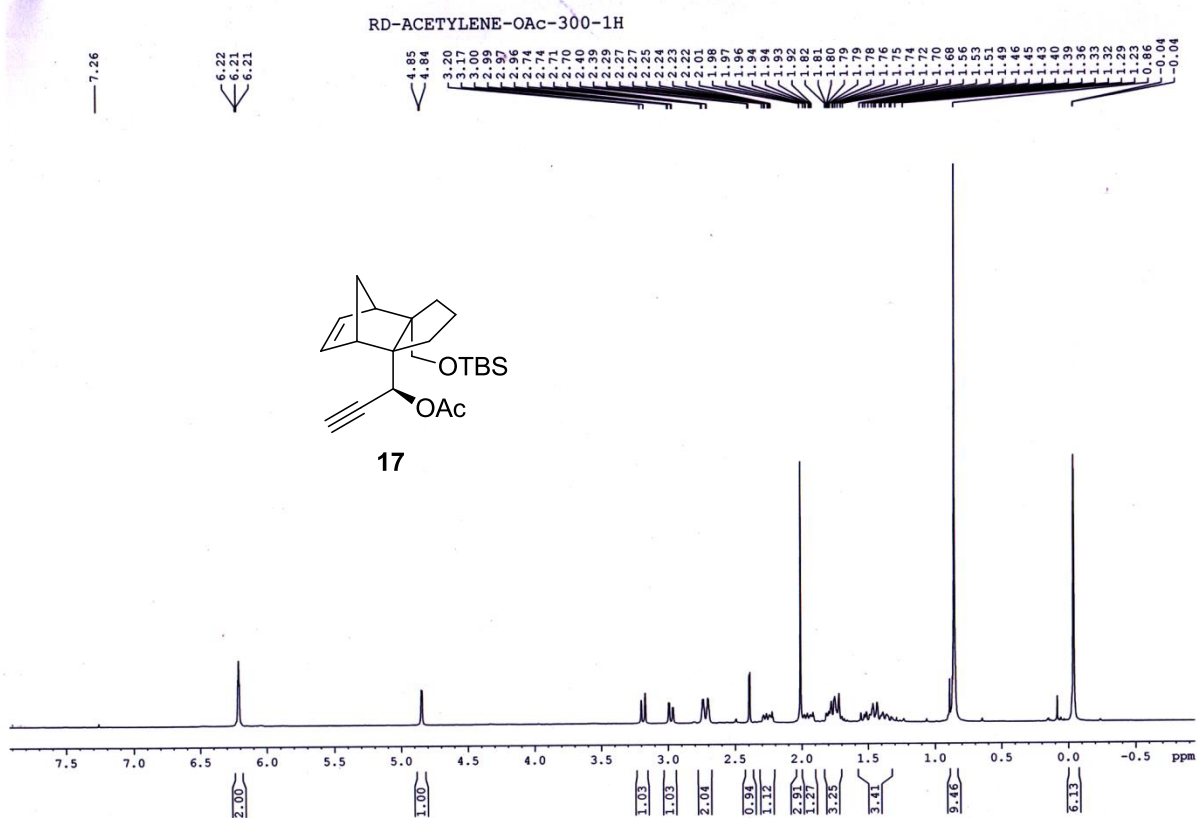

## RD-ACETYLENE-OAc-300-13C

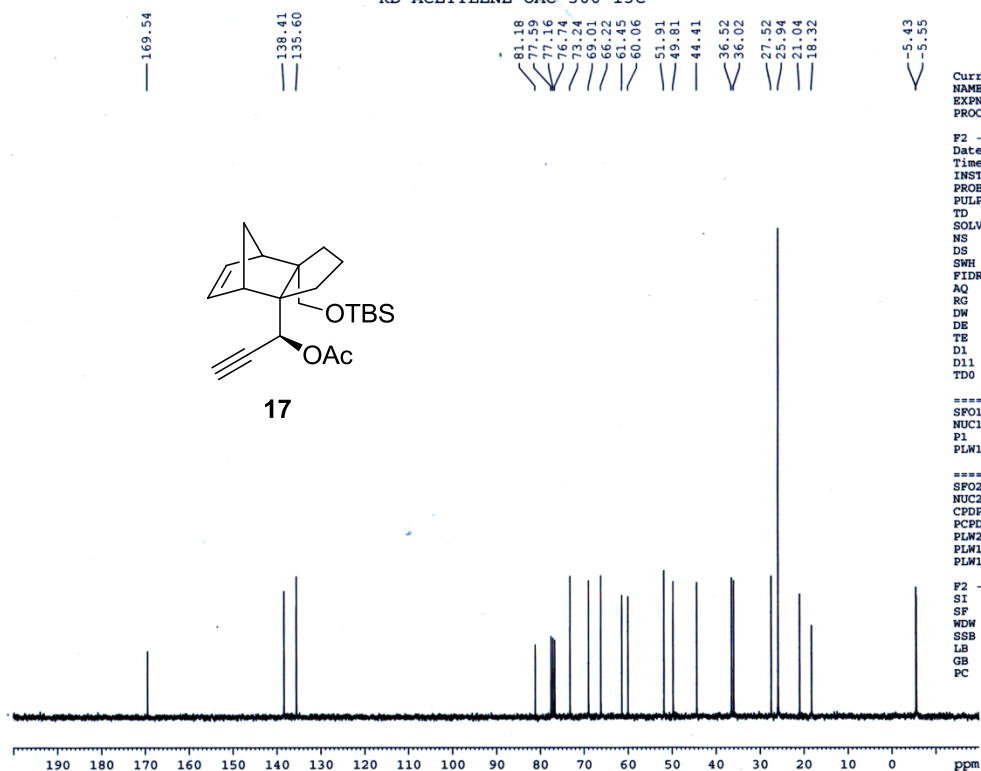

Current Data Parameters  
 NAME RD-ACETYLENE-OAc-300-13C  
 EXPNO 1  
 PROCNO 1

F2 - Acquisition Parameters  
 Date\_ 20140409  
 Time 10.07  
 INSTRUM spect  
 PROBHD 5 mm PABBO, BB-  
 PULPROG zgpg30  
 TD 32768  
 SOLVENT CDCl3  
 NS 69  
 DS 4  
 SWH 21929.824 Hz  
 FIDRES 0.669245 Hz  
 AQ 0.7471104 sec  
 RG 16.41  
 DW 22.800 usec  
 DE 6.50 usec  
 TE 298.6 K  
 D1 2.00000000 sec  
 D11 0.03000000 sec  
 TDO 1

===== CHANNEL f1 =====  
 SFO1 75.4752949 MHz  
 NUC1 13C  
 F1 9.25 usec  
 PLN1 34.00000000 W

===== CHANNEL f2 =====  
 SFO2 300.1312005 MHz  
 NUC2 1H  
 CPDPRG[2] waltz16  
 PCPD2 90.00 usec  
 PLW2 6.99840021 W  
 PLW12 0.17545000 W  
 PLW13 0.14211001 W

F2 - Processing parameters  
 SI 32768  
 SF 75.4677408 MHz  
 WDW EM  
 SSB 0  
 LB 1.00 Hz  
 GB 0  
 PC 1.40
